# Supplementary material
Source: publisher figshare collection journal article supplement (https://gsapubs.figshare.com/articles/dataset/_/17139308)
Supplement: Supplementary file 1 [file 1]

## Sheet: Sumary
Borehole	Calcareous microfossils	Organic microfossils	TOC	Geochem. (Isotopes)	Total
1AS-51-AM	27	27	27	11	92
1AS-52-AM	6	19	19	9	53
1AS-105-AM	27	20	90	11	148
1AS-7D-AM	18	7	0	0	25
1AS-8-AM	15	2	0	0	17
1AS-31-AM	22	8	0	0	30
DSDP Site 153	0	36	0	0	36
DSDP Site 321	0	95	0	0	95
DSDP Site 354	0	57	0	0	57
TOTAL	115	271	136	31	553
1AS-105-AM ¹	0	91	0	0	91
1AS-7D-AM²	33	36	0	0	69
1AS-8-AM²	22	29	0	0	51
1AS-31-AM³	39	28	0	0	67
Table with the number of users studied in this work and the multiproxy used. Previous works used: ¹Jaramillo et al., 2017; ²Linhares et al., 2017, 2019, and ³Linhares et al., 2011.

## Sheet: 1AS-51-AM
			Palynomorph. Continental
Section	Depth_m	Age_Ma GTS 2012 (Lorente)	Arecipites perfectus	Azolla sp.	Bombacacidites baculatus	Bombacacidites bellus	Bombacacidites brevis	Bombacacidites nascimentoensis	Bombacacidites sp. 1	Camarazonosporites crassus	Camarazonosporites sp.	Cichoreacidites longispinosus	Corsinipollenites oculusnoctis	Crassiectoapertites columbianus	Crassoretitriletes vanraadshooveni	Crototricolpites annemariae	Crototricolpites cf. C. finitus	Crototricolpites finitus	Deltoisdospora adriennis	Distaverrusporites margaritatus	Echinosporis sp.	Echiperiporites akanthos	Echiperiporites lophatus	Echiperiporites sp.	Echitricolporites spinosus	Echitriletes muelleri	Fenestrites spinosus	Grimsdalea magnaclavata	Jandufouria minor	Jandufouria seamrogiformis	Ladakhipollenites? caribbiensis	Ladakhipollenites sp.	Laevigatosporites tibuensis	Magnastriatites grandiosus	Margocolporites fastigiatus	Margocolporites muellerae	Matonisporistes sp.	Mauritiidites franciscoi franciscoi	Mauritiidites franciscoi minutus	Mauritiidites franciscoi pachyexinatus	Meliapollis sp.	Microfoveolatisporis sp.	Monoporopollenites annulatus	Multimarginites vanderhammenii	Nijssenosporites fossulatus	Ornate spore	Paleosantalaceaepites cf. P. cingulatus	Perisyncolporites pokornyi	Podocarpidites sp.
1AS-51-AM	9.4	3.82004				12		1	1														1		1			41			1			1				1		1
	27.9	4.11597																							1	1							1
	33.95	4.21275				7		1	1						2			1	4				1		2		1	41			3		1	1				4					2
	41.15	4.32792				7		1	1		1	1			5	1			10					3	1			31			1		1	1				2	1				1	1					1
	57.25	4.58546		2		1		1	1						2				2						1			24			1			1				2
	58.15	4.59986				2		1	1						1	1			13				1		1	1		63			1			1				2							1
	65.3	4.71423		5										1														1
	66.4	4.73182		1		4		1	1						2				1						1			19			10		1	1				3
	72.4	4.8278													1										1			2			1		1	1				5
	92.3	5.14612																													1							2					1
	93.4	5.16372
	94.3	5.17812																															1
	99.4	5.2597
	100.4	5.27569													1				2				1	1	1			4			1
	116.3	5.52905		1	1	2		1	1	1	1	1			3	1			2									65			1		1				1	4	1				1						3
	121.5	9.95911		3																			1	1		2		1					1							1
	143.5	10.61										1			7						1			1		1	1						1					19		1			1
	145	10.6543			1	2		1	1			1				1												1					1					13					1
	149.6	10.7901				1		1	1					1					2					1				2					1					6
	150	11.0746		1					1			1	1			1					1		1							1			1			1		21					1		1
	155.3	14.859	1						1						1									2									1					3					1
	158	16.3319	1		1				1			1							1																1			17					1						1
	159.8	17.3144							1												1					1			1				1		1			12			1		1			1	1	1
	160.4	17.6419					1		1								1		1	1												1						8				1
	162	18.5153							1				1																				1										1
	166.75	21.1081							1							1																						7
	168.7	22.1725							1			1							2			1																12
[truncated: 81 more columns]

## Sheet: 1AS-52-AM
			Palynomorph. Continental																																										Dinocysts
Section	Depth_m	Age_Ma GTS 2012 (Lorente)	Azolla sp.	Bombacacidites baculatus	Bombacacidites sp.	Bombacacidites sp. 1	Camarazonosporites crassus	Camarazonosporites sp.	Cichoreacidites longispinosus	Corsinipollenites oculusnoctis	Crassiectoapertites colombianus	Crassoretitriletes vanraadshooveni	Deltoisdospora adriennis	Echiperiporites akanthos	Echiperiporites lophatus	Echitricolporites maristellae	Echitriletes intercolensis	Echitriletes muelleri	Fenestrites spinosus	Grimsdalea magnaclavata	Jandufouria minor	Jandufouria seamrogiformis	Ladakhipollenites? caribbiensis	Laevigatosporites tibuensis	Magnastriatites grandiosus	Malvacipolloides maristellae	Matonisporites sp.	Mauritiidites franciscoi franciscoi	Mauritiidites franciscoi pachyexinatus	Monoporopollenites annulatus	Nijssenosporites fossulatus	Podocarpidites sp.	Polyadopollenites mariae	Polypodiaceiosporites sp.	Polypodiisporites sp.	Proxapertites tertiaria	Retibrevitricolpites catatumbus	Rhoipites guianensis	Rhoipites hispidus	Rhoipites sp.	Tricolpites sp.	Tricolpites? pseudoclarensis	Verrucatosporites usmensis	Tottal	Undetermined dinocysts	Operculodinium spp.	Spiniferites spp.	Selenopemphix armata	Selenopemphix spp.
1AS-52-AM	9.35	3.82003			1	1			1		1	4	5				1			11				1	2			3			1	4			1		1			1		1	1	41
	23.85	4.57141																					1	1											1								1	4
	39.4	5.37719											1	1	1	1					1			1					1						1								2	10
	40.1	5.41346				1			1			1	2				1			2					2			2							1								1	14	1
	42.35	5.53005										1	1			1	1			1				1	1				1									1	1	1				11
	51.15	8.54035		42	1	1							3		1	1					1		1	1	3				1		1			1				1				1		60
	55.3	9.96011				1				1			2							2				1											1								2	10	2	2	2
	61.3	10.2175					1	1	1				3			2	1			5		1		1	2	1		19	1		1	1				1	1			1	1			45	1
	65.1	10.3805						1				1	1					1		7								4							1	1					1	1	2	21	4
	67.1	10.4663																		7												1											1	9
	74.35	10.7772		3									1							3				1				1																9
	74.65	10.7899																		23				1					1															25	2
	78.4	12.1	1						1				6			1			1					1	9		1	3	1	1	1	2	1		1	3	1	1		1	1			38
	82.65	13.5848																						1																		1		2	1
	82.9	13.6721																						1																				1	2			1	2
	83.9	14.0215																										1														1		2
	84	14.0564																											1															1
	86.3	14.8599										2	1							1				1	2			2				2			1							1	2	15	2
[truncated: 21 more columns]

## Sheet: 1AS-105-AM
			Dinocysts																											Foraminifera			Others			Carbonate												Isotopes
Section	Depth_m	Age_Ma GTS 2012 (Lorente)	Undetermined dinocysts	Apteodinium vescum	Dinocyst brown	Cleistosphaeridium ancyreum	Cleistosphaeridium placacanthum	Cyclopsiella elliptica	Hystrichokolpoma rigaudiae	Hystrichokolpoma spp.	Impletosphaeridium prolatum	Leiosphaeridia "scabrate"	Leiosphaeridia sp.	Lingulodinium machaerophorum	Operculodinium centrocarpum	Operculodinium israelianum	Operculodinium giganteum	Operculodinium sp.	Quadrina condita	Quadrina? "incerta"	Paleocystodinium sp.	Spiniferites membranosus	Spiniferites "normalis"	Spiniferites sp.	Selenopemphix sp.	Trinovantedinium ferugnomatum	Trinovantedinium xylochoporum	Tuberculodinium vancampoae	Total	Undetermined Foraminifera	Globigerinoides sp.	Total	Acritarchs	Foram linings	Marine/Transitional ichthyolite	Sample mass_g	Total S_%	Total C_%	capsule mass (g)	TOC mass_g	capsule mass + sample after acidification (g)	TOC_%	m capsule + m TOC	decarbonated sample mass (g)	RI %	Calcium carbonate content (%)	S/TOC (%)	d15N (‰)	d13C (‰)
1AS-105-AM	25																												0							0.2688	0.31473	1.5329	26.4716	0.2625	26.7197	1.4785	26.7341	0.0144	5.48571	0.453152	0.212871	3.89137	-28.3385
	26.35
	27.2																													1		1
	27.5
	28																												0	1		1				0.2669	0.26843	2.0339	27.617	0.2696	27.8411	1.7609	27.8866	0.0455	16.8769	2.27409	0.152439
	29.6																												0							0.2627	2.196	5.8643	27.7964	0.261	28.0184	5.808	28.0574	0.039	14.9425	0.468979	0.378099
	30
	31.95
	32.75
	34																												0							0.266	2.0088	1.3588	27.4625	0.2671	27.6863	1.2972	27.7296	0.0433	16.2112	0.513128	1.54857
	34.6
	35.4							1					1														1		4					1
	35.75		1																										1							0.261	0.21321	1.5219	28.5426	0.2686	28.7732	1.4584	28.8112	0.038	14.1474	0.528955	0.146194
	36.75		2																										2							0.2653	0.45432	0.99692	26.9534	0.2679	27.1966	0.91678	27.2213	0.0247	9.21986	0.667566	0.495561
	38.43
	39.8												1																1
	41.45																													1	1	2
	44.7																												0
	45.03
	46.9																												0							0.2644	0.25333	2.2967	27.5977	0.267	27.8399	2.1833	27.8647	0.0248	9.28839	0.944622	0.116031
	47.9																												0							0.2608	0.20788	1.0905	27.8126	0.2675	28.054	0.9437	28.0801	0.0261	9.75701	1.22284	0.220282
	50.3
	51.6																												0
	52.18
	52.9																		1										1
	53.4																												0							0.2607	4.4545	12.696	28.1554	0.2666	28.3591	11.37	28.422	0.0629	23.5934	11.0456	0.391777
	54.85																												0							0.2667	0.45735	0.44308	28.2644	0.2659	28.5049	0.41719	28.5303	0.0254	9.55246	0.215664	1.09626
	55
	59.4																												0
	60.7																												0							0.2688	0.17687	0.3832	27.5508	0.2673	27.7996	0.34185	27.8181	0.0185	6.92106	0.344445	0.517391
	63.5																												0
	63.7																												0							0.2671	0.72889	0.8428	27.694	0.266	27.9186	0.66106	27.96	0.0414	15.5639	1.51389	1.10261
	65.7																												0							0.2641	0.37026	1.1864	27.451	0.2682	27.6884	0.92691	27.7192	0.0308	11.484	2.16155	0.399456
	69.8																												0
	70.5																												0
	73.8																												0							0.2648	0.15786	1.2995	27.787	2.2686	28.0234	1.0824	30.0556	2.0322	89.5795	1.80844	0.145843
	75.3											3																	3
	76.2		2								1		1																4							0.2645	0.22719	1.1198	27.2688	0.2643	27.5043	0.84323	27.5331	0.0288	10.8967	2.30383	0.269428
	76.6																												0							0.2692	0.076324	9.4902	26.8119	0.269	26.8798	0.26014	27.0809	0.2011	74.7584	76.8864	0.293396
	76.7		1																										1
	79.2																												0
	79.25																												0							0.2634	0.30062	0.63584	27.4665	0.2633	27.7117	0.50659	27.7298	0.0181	6.87429	1.07665	0.593419
	79.9																												0
	80.3		2																					1					3							0.2647	2.5573	3.8588	27.206	0.2632	27.419	2.8614	27.4692	0.0502	19.0729	8.30834	0.893723	4.65261	-27.8812
	83.3																												0							0.2684	0.38407	1.086	28.2339	0.263	28.4574	0.79014	28.4969	0.0395	15.019	2.46451	0.486078
	84.4																												0							0.2637	2.2962	5.1803	27.1608	0.268	27.3753	4.6336	27.4288	0.0535	19.9627	4.55401	0.495554
	85.3																												0
	85.83																												0							0.2647	5.8733	18.347	26.4361	0.2603	26.6305	15.94	26.6964	0.0659	25.3169	20.0503	0.368463
	91.5																												0
	95.8																												0
	96.7				3									3		2							1					1	10
	97.6		1		11								4	53		1			6							1		4	81
	98.1																		3									2	5
	98.55		1																										1				1			0.2644	0.56524	1.3355	28.1009	0.2658	28.3287	0.6447	28.3667	0.038	14.2965	5.75436	0.876749	1.4198	-27.5801
	100.4																												0
	101.2	3.82003	15																					9					24
	101.3	3.82201																											0							0.2675	2.724	1.8487	27.9084	0.2681	28.1247	1.7779	28.1765	0.0518	19.3211	0.589764	1.53214
	103.7	3.86951																											0
	105.5	3.90514																											0
	110.7	4.00806																											0
	112.5	4.04368																											0							0.2644	0.36953	0.55078	27.7035	0.2649	27.9432	0.52443	27.9684	0.0252	9.51302	0.219496	0.704632
	116.65	4.12582																											0
	119	4.17233																											0							0.2623	2.4738	1.8695	27.6833	0.2629	27.902	1.6907	27.9462	0.0442	16.8125	1.4894	1.46318
	120.3	4.19806																											0
	120.7	4.20597										1																	1
	120.9	4.20993																	4										4
	120.95	4.21092																											0							0.2653	1.9145	3.6444	27.5442	0.2682	27.7577	3.3275	27.8124	0.0547	20.3952	2.63978	0.575357
	121.95	4.23071	1																										1							0.2647	0.34745	0.34571	26.1446	0.2609	26.3828	0.31021	26.4055	0.0227	8.70065	0.295715	1.12005	3.5235	-27.019
	125.3	4.29702										1																	1
	130.1	4.39202										1																	1
	131.05	4.41082																											0							0.262	0.19015	1.5036	27.2692	0.2632	27.4402	0.89023	27.5324	0.0922	35.0304	5.10937	0.213596
	131.35	4.41676																											0							0.2605	0.96782	2.8885	27.2844	0.2611	27.4887	2.2566	27.5455	0.0568	21.7541	5.26373	0.428884
	135.05	4.49097																											0							0.2685	0.32815	2.8041	27.0626	0.2688	27.298	2.557	27.3314	0.0334	12.4256	2.05834	0.128334
	135.1	4.48999																											0
	136.5	4.51868																											0							0.2698	0.36482	4.1598	28.1207	0.2696	28.3671	3.8898	28.3903	0.0232	8.60534	2.2491	0.0937889
	138.1	4.55035																											0							0.2625	0.21486	0.53891	26.864	0.2654	27.1063	0.43574	27.1294	0.0231	8.70384	0.859406	0.493092
	140.25	4.5929																											0							0.2641	0.054656	0.24673	27.5129	0.2649	27.746	0.20587	27.7778	0.0318	12.0045	0.340364	0.265488
	140.9	4.60577																											0
	141	4.60775																											0							0.2624	0.69184	1.5758	27.8556	0.2638	28.0845	1.4412	28.1194	0.0349	13.2297	1.12122	0.480044
	141.25	4.61269																											0							0.2666	1.1655	2.8464	27.9302	0.2609	28.1365	2.1247	28.1911	0.0546	20.9276	6.01176	0.548548	5.09915	-27.2708
	143.2	4.65129																											0
	148.2	4.75025																											0
	149.4	4.774																											0							0.2609	0.03653	0.51732	28.106	0.2639	28.3394	0.50407	28.3699	0.0305	11.5574	0.110372	0.0724701
	150	4.78587																											0
	151.45	4.81457																											0							0.265	0.16342	0.96979	29.1772	0.2689	29.4094	0.93163	29.4461	0.0367	13.6482	0.317873	0.175413
	155.1	4.88681																											0
	156.95	4.92343																											0							0.2619	0.045563	0.57153	27.3572	0.2629	27.5994	0.55953	27.6201	0.0207	7.87372	0.09996	0.0814308
	158.6	4.95608																											0
	160	4.98379																											0							0.26	0.23167	0.56823	28.7219	0.2661	28.9393	0.38865	28.988	0.0487	18.3014	1.4959	0.596089
	161.66	5.01664																											0							0.2669	2.053	4.2608	27.4233	0.2686	27.6459	3.8881	27.6919	0.046	17.1258	3.10459	0.528021
	161.7	5.01744																											0
	162.15	5.02634																											0							0.2683	0.28425	1.3226	28.2154	0.2689	28.464	1.2132	28.4843	0.0203	7.54927	5.59809	0.234298
	164.31	5.06909																											0							0.2662	0.69094	1.2385	28.05	0.2653	28.2731	0.65056	28.3153	0.0422	15.9065	#REF!	1.06207
	165.5	5.09265																											0
	166.13	5.10511	2																										2							0.2688	0.25368	3.1219	27.4115	0.2688	27.6516	2.7868	27.6803	0.0287	10.6771	2.79138	0.0910291
	167.27	5.12768																											0							0.261	0.46763	1.4779	27.9498	0.2673	28.1765	1.2587	28.2171	0.0406	15.1889	1.82594	0.371518
	167.33	5.12886																											0							0.2664	0.34312	2.7665	28.0995	0.2663	28.3401	2.6044	28.3658	0.0257	9.65077	1.35029	0.131746
	167.4	5.13025																											0							0.267	0.44046	0.57633	27.9719	0.2624	28.2004	0.51199	28.2343	0.0339	12.9192	0.535952	0.86029
	168.2	5.14608																											0							0.2642	1.5291	1.0902	27.56	0.2647	27.7853	0.72377	27.8247	0.0394	14.8848	3.05236	2.11269
	168.6	5.154																											0							0.2623	0.069045	0.76221	27.5272	0.2673	27.7637	0.64912	27.7945	0.0308	11.5226	0.94204	0.106367	3.71077	-26.9583
	168.85	5.15895	12															2											14							0.2668	0.4597	0.70884	27.5377	0.2636	27.7711	0.61035	27.8013	0.0302	11.4568	0.820422	0.753174
	172.2	5.22525																											0							0.2611	0.13113	1.3369	26.2348	0.2694	26.4941	1.2302	26.5042	0.0101	3.74907	0.888811	0.106592
	172.3	5.22723																											0							0.2677	0.098053	0.85244	27.2746	0.2677	27.5253	0.75807	27.5423	0.017	6.35039	0.786102	0.129346
	172.4	5.22921																											0							0.2673	0.30609	4.4806	27.0544	0.2631	27.2971	3.8404	27.3175	0.0204	7.75371	5.33287	0.0797026
	176.6	5.31233																											0
	176.8	5.31629																											0							0.2651	0.066818	0.78979	27.728	0.2639	27.9341	0.21063	27.9919	0.0578	21.9022	4.8244	0.317229
	181.35	5.40635																											0							0.269	3.1407	1.8561	27.2592	0.2686	27.4867	1.5121	27.5278	0.0411	15.3016	2.86552	2.07705
	182	5.41921																											0
	183.15	5.44197																											0							0.2675	0.67653	7.4812	28.1859	0.268	28.4256	5.8018	28.4539	0.0283	10.5597	13.9894	0.116607
	187.85	5.7793																											0							0.2643	4.0507	9.4356	27.5726	0.2673	27.7688	9.4356	27.8399	0.0711	26.5993	0	0.4293
	188	5.93033																											0							0.2696	0.32136	2.5846	27.7917	0.2617	28.003	1.9482	28.0534	0.0504	19.2587	5.30121	0.164952
	192	9.96015																											0
	197.15	10.0038																											0							0.2694	0.4531	1.5708	26.935	0.2645	27.152	1.1634	27.1995	0.0475	17.9584	3.39364	0.389462	4.38097	-26.6233
	197.2	10.0042																											0
	199.8	10.0263																											0
	201	10.0365																											0							0.2644	0.79262	6.6562	28.4662	0.2606	28.6863	5.125	28.7268	0.0405	15.5411	12.7549	0.154658
	208.15	10.0971																											0							0.2622	0.53457	1.575	27.453	0.2644	27.6971	1.172	27.7174	0.0203	7.67776	3.35699	0.456118
	209	10.1043																											0							0.2693	2.547	20.275	27.7945	0.26	28.0203	16.449	28.0545	0.0342	13.1538	31.8706	0.154842
	210	10.1128																											0							0.2671	0.44224	8.3067	27.6095	0.2649	27.8198	6.695	27.8744	0.0546	20.6116	13.4255	0.0660553
	210.1	10.1136																											0
	213.2	10.1399																											0
	215.75	10.1615																											0							0.2641	0.37026	1.1864	27.451	0.2682	27.6884	0.92691	27.7192	0.0308	11.484	2.16155	0.399456
	221.8	10.2128																											0
	225.3	10.2425																											0							0.2626	0.24308	0.77976	27.4732	0.2655	27.7259	0.71502	27.7387	0.0128	4.82109	0.539284	0.339963
	225.79	10.2466																											0							0.2662	6.4105	16.021	27.1929	0.2611	27.3735	12.581	27.454	0.0805	30.8311	28.6552	0.509538
	225.9	10.2476																											0
	230.2	10.284																											0
	230.4	10.2857																											0							0.2655	3.3879	10.302	28.1187	0.2639	28.329	8.3211	28.3826	0.0536	20.3107	16.5009	0.407146
	233.4	10.3111																											0							0.2664	0.21952	0.87807	27.6773	0.2654	27.9167	0.63291	27.9427	0.026	9.79653	2.04218	0.346842
	234	10.3162																											0							0.2642	0.05652	0.85385	27.4355	0.2659	27.6869	0.62837	27.7014	0.0145	5.45318	1.87825	0.089947	3.26154	-26.6655
	235	10.3247																											0
	235.4	10.3281																											0							0.2687	5.3658	10.176	27.7599	0.2675	27.9478	7.666	28.0274	0.0796	29.757	20.9083	0.699948
	236.45	10.337																											0							0.2618	4.707	12.1	27.2663	0.2651	27.4625	9.2423	27.5314	0.0689	25.9902	23.8046	0.509289
	241.6	10.3807																											0
	246	10.418																											0							0.2621	0.058173	0.62817	26.4547	0.2676	26.5887	0.14156	26.7223	0.1336	49.9253	4.05346	0.410942
	246.8	10.4248																											0
	248.54	10.4395																											0							0.2607	1.5754	2.8189	27.479	0.2677	27.6815	1.3441	27.7467	0.0652	24.3556	12.2851	1.17209
	249.2	10.4451																											0							0.2665	0.18555	0.82171	27.7019	0.269	27.9536	0.60215	27.9709	0.0173	6.43123	1.82893	0.308146
	250	10.4519																											0
	250.59	10.4569																											0							0.2671	0.34384	0.61583	27.6781	0.266	27.9281	0.43343	27.9441	0.016	6.01504	1.51939	0.7933
	253.1	10.4782																											0						3	0.2654	3.4191	0.56329	28.0843	0.2675	27.9281	0.38598	28.3518	0.4237	158.393	1.47699	8.85823
	254.03	10.4861																											0							0.2676	0.28756	0.60074	27.8691	0.2645	28.1089	0.49588	28.1336	0.0247	9.33837	0.873484	0.579898
	254.3	10.4883																											0
	254.43	10.4894																											0							0.2621	0.185666	0.61428	26.2552	0.264	26.5148	0.23753	26.5192	0.0044	1.66667	3.13833	0.781653
	258.35	10.5227																											0							0.2626	1.6067	1.234	27.1033	0.2644	27.3289	1.0134	27.3677	0.0388	14.6747	1.8376	1.58545
	262.3	10.5562																											0
	267.9	10.6036																											0
	272.1	10.6393																											0
	273.6	10.652																											0							0.2608	0.51015	1.0033	28.0875	0.2657	28.3328	0.43695	28.3532	0.0204	7.67783	4.7177	1.16752
	277.8	10.6876																											0
	281	10.7147																											0							0.2692	1.5595	12.281	27.4257	0.2629	28.4455	0.23336	27.6886	-0.7569	-287.904	100.357	6.68281	5.19697	-26.8432
	282	10.7232	2												1			3						2					8							0.2694	0.2922	1.5775	27.9286	0.2634	28.0749	0.33696	28.192	0.1171	44.4571	10.3337	0.867165
	284	10.7401	1			2	5	1						2		38			3				1	107				1	161
	286.5	10.7613	3																					1					4							0.2668	0.24943	3.0411	27.5274	0.2615	27.6925	0.50444	27.7889	0.0964	36.8642	21.1304	0.494469	-1.66785	-30.9533
	289.9	10.7896												1					1				15						17
	292.55	10.9435																											0							0.266	3.2005	18.124	28.0955	0.267	28.3119	14.815	28.3625	0.0506	18.9513	27.564	0.216031
	293.2	10.9812	28	1																		1		3					32							0.2644	3.6391	5.2776	27.278	0.2609	27.4934	4.4399	27.5389	0.0455	17.4396	6.97804	0.819636
	293.3	10.987	2	5		2	6			1						7			19	1			16	65				3	127
	294.5	11.0567																											0
	298.9	11.3121				3	1												1					3					8
	299.3	11.3353																						1					1
	301.7	11.4747																											0
	302.5	11.5211																											0
	304.6	11.6431																											0
	308.79	11.8863																											0				1			0.2678	7.857	5.6355	27.0656	0.2661	27.2375	4.7629	27.3317	0.0942	35.4002	7.26876	1.64963	-1.66785	-28.1019
	309.2	11.9101																											0
	318	12.421																											0
	320.2	12.5488																											0
	320.7	12.5778																											0
	324.3	12.7868	1																										1
	324.6	12.8042																											0
	324.9	12.8216					2																1						3
	325.1	12.8333																											0
	325.3	12.8449																											0
	326.2	12.8971																											0					33
	327	12.9436	1																										1
	332.3	13.2513																											0
	349.6	14.2557																											0							0.268	0.0165	0.16936	26.5263	0.2615	26.782	0.098184	26.7878	0.0058	2.21797	0.592896	0.168052
	355.7	14.6098																											0
	357.7	14.726																											0
	358.8	14.7898																											0							0.26	1.745	1.3199	27.6243	0.2675	27.864	1.1276	27.8918	0.0278	10.3925	1.60186	1.54753
	359	14.8014																											0
	360.9	15.425																											0
	364.8	17.8625																											0
	370.3	21.3																											0
	371	21.7375																											0							0.2668	0.76038	0.71	27.4182	0.2678	27.678	0.5967	27.686	0.008	2.9873	0.943789	1.27431
	373.5	23.3																											0
	374.65	24.0187																											0							0.2668	0.95658	0.75293	26.8588	0.265	27.1122	0.60674	27.1238	0.0116	4.37736	1.21776	1.57659
	404.55	42.7062																											0							0.2605	1.3602	0.8732	27.6982	0.2633	27.9441	0.55987	27.9615	0.0174	6.60843	2.61004	2.42949
[truncated: 3 more columns]

## Sheet: 1AS-7D-AM
			Palynomorph. Continental
Section	Depth_m	Age_Ma GTS 2012 (Lorente)	Arecipites perfectus	Bombacacidites spp.	Chomotriletes rubinus	Cicatricosisporites sp.	Cichoreacidites longispinosus	Cingulatisporites rugulatus	Cistacearumpollenites poruscircularis	Corsinipollenites oculusnoctis	Crassiectoapertites columbianus	Crassoretitriletes vanraadshoovenii	Crototricolpites annemariae	Crototricolpites spp.	Deltoidospora adriennis	Echinosporis spp.	Echiperiporites akanthos	Echiperiporites sp.	Echiperiporites stelae	Echitricolporites "microechinatus"	Echitricolporites spinosus	Echitricolporites spp.	Fenestrites sp.	Foveotricolporites pseudodubiosus	Grimsdalea magnaclavata	Heterocolpites incomptus	Heterocolpites sp.	Horniella morenoi	Horniella sp.	Inaperturopollenites solimoensis	Jandufouria sp.	Laevigatosporites spp.	Laevigatosporites tibuiensis	Magnastriatites grandiosus	Malvacipollis spinulosa	Malvacipolloides maristelae	Matonisporites mulleri	Matonisporites sp.	Mauritiidites franciscoi	Meliapollis sp.	Monoporites annuloides	Monoporopollenites annulatus	Perfotricolpites digitatus	Perfotricolpites sp.	Perisyncolporites pokornyi	Podocarpidites sp.	Polyadopollenites macroreticulatus	Polyadopollenites mariae	Polyadopollenites sp.
1AS-7D-AM	3.4	8.00691
	14.8	8.19001		3					3						1				2					2	5	1			1	1		18									7	5
	15.95	8.20848
	17.7	8.23659
	22.48	8.31336
	22.55	8.31449
	23.55	8.33055
	27.55	8.3948													2	1	3	4							4	1				4		25		1					1		20	22							1
	27.65	8.3964
	28.35	8.40765
	29.55	8.42692																														6
	29.9	8.43254
	30.3	8.43897
	36.8	8.54337								2																						9									7	9
	39.1	8.58031
	45.95	8.69033
	49.75	8.75137
	50	8.75538
	58	8.88387
	58.15	8.88628
	68.5	9.05252
	71.7	9.10392
	73.6	9.13444																							2							4	5								3
	76.5	9.18102
	78.5	9.21314
	78.85	9.21876
	79.13	9.22326
	84.45	9.30871
	84.65	9.31192
	88.15	9.36813
	89	9.38179
	90	9.39785																							2							8	3
	91.5	9.42194													3	2		3							6	2				2	1	8							2				2
	93.15	9.44844
	94.5	9.47013
	95.8	9.49101
	96	9.49422																							1		5					5									3
	96.3	9.49904
	97.5	9.51831
	98.9	9.5408
	99.9	9.55686
	101.5	9.58898														1																3			1					2		1			1				1
	103.2	9.60986
	106	9.65483
	107	9.6709
	110	9.71908										1										3			1							11			2						23
	111.5	9.74317
	113	9.76727
	113.4	9.77369
	114	9.78333
	114.5	9.79136																							3	2
	115.5	9.80742
	116.2	9.81866
	117.2	9.83473
	117.7	9.84276
	118	9.84757
	119	9.86364		2			3			2															1							3															2		3
	120	9.8797
	121	9.89576
	125	9.96001			2									1		5			3	2	3	5	5		4									2		2			2							6			3
	126.5	9.98115										1		2											11							6										2
	135.5	10.1078
	136.2	10.1176
	140.5	10.1781
	145.7	10.2513
	148	10.2836
	152	10.3399
	155	10.3821
	160.5	10.4595
	161.62	10.4752
	163	10.4946
	163.7	10.5045
	165.2	10.5256
	166	10.5368
	166.7	10.5467
	168	10.565
	172	10.6212
	174.4	10.655
	176.2	10.6803
	178.4	10.7113
	179.2	10.7225
	181.5	10.7549
	184	10.7897						2				4								3					5			2							3							3
	188	11.1583
	193	11.619
	195.5	11.8494
	197.4	12.0244		5																									2			9	2						2
	199	12.1718
	202.8	12.522
	204.3	12.6602
	205.8	12.7984
	212	13.3697
	212.5	13.4157																								3						3	2
	215.5	13.6922
	219.3	14.0423
	220.6	14.1621
	221.1	14.2081
	224	14.5583	2							2			2													2						6		2								3	2	2
	225.5	14.6136
	228.2	14.8623
	230.2	15.0466
	232.7	15.277
	236	15.581
	240.3	15.9772
	244.45	16.3596
	247	16.5946
	248.85	16.765		1						1	1				7											7			1			17	1	9	1			2	2			1	4
	252.2	17.0737
	254.15	17.2534
	256.35	17.4561
	258.5	17.6542
	262.15	17.9905
	263.65	18.1287
	266	18.3453
	267.1	18.4466
	268	18.5295																														11
	269.15	18.6355
	270.55	18.7645
	273.2	19.0087
	279.2	19.5615
	281.3	19.755		1						1					1																	1		1					7		6	2	2	2				2
	285.35	20.1282
	288.6	20.4276
	291.4	20.6856
	294.3	20.9528																																		3
	296.2	21.1279				2				2			3					2											2								2		13				2		5				2
	301.6	21.6254
	304.7	21.9111
	387.75	29.5633
[truncated: 61 more columns]

## Sheet: 1AS-8-AM
			Palynomorph. Continental
Section	Depth_m	Age_Ma GTS 2012 (Lorente)	Bombacacidites baculatus	Bombacacidites bellus	Bombacacidites fossulatus	Bombacacidites muinaneorum	Bombacacidites sp.	Chomotriletes rubinus	Cicatricosisporites sp.	Corsinipollenites oculusnoctis	Crassoretitriletes vanraadshoovenii	Crototricolpites sp.	Deltoidospora adriennis	Echiperiporites akanthos	Echitricolporites "elizabetei"	Echitricolporites "microechinatus"	Echitriletes mueleri	Grimsdalea magnaclavata	Heterocolpites incomptus	Heterocolpites rotundus	Heterocolpites sp.	Horniella caribbiensis	Horniella morenoi	Illexpollenites sp.	Inaperturopollenites solimoensis	Laevigatosporites spp.	Lakiapollis costatus	Magnastriatites grandiosus	Mauritiidites franciscoi	Monoporites annuloides	Monoporopollenites annulatus	Perfotricolpites digitatus	Perfotricolpites sp.	Perisyncolporites pokornyi	Polyadopollenites mariae	Proxapertites sp.	Psilabrevicolpites cf. p. flexibilis	Psiladiporites minimus	Psilamonocolpites amazonicus	Psilamonocolpites nanus	Psilamonoletes tibui	Psilaperiporites sp.	Psilastephanocolporites scheneideri	Psilastephanoporites sp.	Psilatricolporites atalayensis	Psilatricolporites cf. p. varius	Psilatricolporites crassoexinatus	Psilatricolporites labiatus	Psilatricolporites spp.
1AS-8-AM	28.17	9.93048
	32	9.95964					8									2			19							41		6							6			3	18		6						15
	35.05	9.98287
	38.5	10.0091
	44.55	10.0552
	44.69	10.0563
	50.55	10.1009
	55.5	10.1386														9									3	18				3				4					7	13	10						3		8
	57.77	10.1559
	59.25	10.1671
	61	10.1805		3									6		3	3			6							18		5		6									6										3
	62.6	10.1926
	70.9	10.2558
	71.3	10.2589
	77.1	10.3031
	79.6	10.3221
	86	10.3708				6													3						1						3
	86.1	10.3716
	87.3	10.3807
	88	10.3861																3		2		1				5			2					8							2
	92.43	10.4198
	92.63	10.4213
	96.05	10.4473
	96	10.447
	99.15	10.471
	102.6	10.4972
	103.2	10.5018
	103.05	10.5006
	109	10.546
	110.6	10.5581
	110.73	10.5591
	110.8	10.5597
	111.26	10.5632
	111.5	10.565
	116.9	10.6061
	118.9	10.6213
	119.7	10.6274
	121.65	10.6423
	127.35	10.6857
	132.45	10.7245
	135.3	10.7462
	137.3	10.7614
	137.45	10.7626
	140.45	10.7854
	141	10.7901			3				2				3		1			6		5			2	1	1	25		1				3				3			3		12	5					1	12	11
	141.5	10.8093
	145	10.944
	150.1	11.1403
	154.05	11.2923
	158.36	11.4581
	159.2	11.4905
	165	11.7137	9								6	1	6											12		1				1									12		1
	166	11.7522
	166.6	11.7753
	168.45	11.8464
	172.23	11.9919		3																					6	30				3									12		6
	172.3	11.9946
	173.6	12.0446
	173.85	12.0543
	177.15	12.1813
	179.45	12.2698
	184	12.3294																								21			12
	187.05	12.5622
	193.55	12.8124																	3							21				3	9			3
	193.85	12.8239
	195.14	12.8736
	195.85	12.9009
	198.1	12.9875
	199	13.0221														6			6							18				3	3							3	39		3					3	1		24
	200.6	13.0837
	208.55	13.3896
	214	13.5994
	214.7	13.6263	2								20		3						2					3		124		3	2	20	3			2					3		28								26
	218	13.7533
	220	13.8303	2				2										2		3		5			14		7	1		39	5				2			2		9	2			9		2	12	5		3
	225.25	14.0323
	225.25	14.0323
	234.5	14.3883
	246.76	14.8605						1			29																		1	1					2
	251.7	15.2633
	258.3	15.8016
	263.35	16.2134
	271	16.8373
	274.1	17.0901
	304.5	19.5693
	314.15	20.3563
	315.45	20.4623
	323.4	21.11											1	1					10	1						36		7	2		3		2	1		2			14	2	33								5
	330.4	21.4004
	336.7	21.6617
	336.8	21.6658
	342	21.8815
	348.95	22.1698
	357.25	22.5141
	368	22.96								8										1	1													5	3				8	1						1
	368.5	22.9808
	383.7	23.6112
	403	24.4118
[truncated: 32 more columns]

## Sheet: 1AS-31-AM
			Ostracods																							Dinocysts						Foraminifera													Others
																																Planktonic				Benthic
Section	Depth_m	Age_Ma GTS 2012 (Lorente)	Candona? sp.	Cypria aqualica	Cytheridella sp.	Darwinula fragilis	Cyprideis amazonica	Cyprideis aulakos	Cyprideis caraionae	Cyprideis cyrtoma	Cyprideis graciosa	Cyprideis inversa	Cyprideis lacrimata	Cyprideis machadoi	Cyprideis olivencai	Cyprideis pebasae	Cyprideis sulcosigmoidalis	Cyprideis sp. 1	Cyprideis sp. 2	Cyprideis sp. 3	Cyprideis sp. 4	Cyprideis sp. 5	Cyprideis? sp. 6	Cyprideis? sp. 7	Total	Undetermined dinocysts	Leiosphaeridia sp.	Operculodinium centrocarpum	Operculodinium sp.	Spiniferites sp.	Total	Undetermined Foraminifera	Globigerina sp.	Globigerinoides sp.	Globorotalia sp.	Ammonia tepida	Amphistegina sp. 1	Amphistegina sp. 2	? Cybicides sp.	Planorbulina sp.	Quinqueloculina sp.	Textularia sp. 1	Textularia sp. 2	Total	Marine/Transitional ichthyolite	Marine/Transitional Mollusk
1AS-31-AM	3.05
	6.17
	9.15
	9.85
	11.45
	12
	15.3
	20				1																				1
	20.53
	22
	22.55
	23.21
	25.75
	25.86																															1												1
	26.1					1																			1
	26.12					2																			2
	26.9
	29.5																															4												4
	29.51
	29.88
	32.68
	35.58
	37.85
	39.55			2		2								1											5
	45
	45.1
	50.5
	54.89
	56.5						2				7														9							1	1											2
	58						1				1														2
	63
	65.25
	89.8
	90.15
	93
	93.2
	96.25
	99.3
	102.35
	105.3
	110.6
	122.29
	127
	135.9						2																		2
	138.2	9.53007		41		19			13		17			2	1										93
	140.85	9.56933
	141	9.57156
	148.2	9.67822
	148.75	9.68637						15									26						2		41
	153	9.74933													33										33
	157.25	9.8123		26		2			54	13	29		3	16		8						8			159
	163	9.89748					6																		6
	166.4	9.94785
	168.35	9.97674
	170.8	10.013					22	19	2	1	8			30	12	20	21	1						4	136							1												1
	170.9	10.0145						1																	1							4	2	2	1		15	4	1	1		1		30
	171.4	10.0219																				4			4																2			2
	171.8	10.0279
	172.4	10.0367	1		5							2			3	4	2	2		1					20												8	6			1		2	17
	172.5	10.0382															1								1
	173.6	10.0545																								6	2	1	2		11
	174.3	10.06					12	10			2			3		6	5								38							1												1
	174.35	10.0656																														1												1
	174.4	10.0664						14						13		42									69												2							2
	174.53	10.0686																							0							6		3			1							10
	174.55	10.0686					6				10			3		19	6								44
	174.65	10.0701					13	5			22					6	11				1			2	58
	174.7	10.0708					10	2			14				12	8	4								50	4					4
	174.8	10.0723																											2		2
	174.82	10.0726						1			1														2
	174.9	10.0738					1	1			6			2		2									12
	175	10.0753					38	31			25			45	8	41	22	1	1				5	5	212																				1	3
	175.05	10.076					1				2						2								5	6					6
	175.3	10.0797
	175.45	10.0819
	175.5	10.0827
	176.8	10.1019
	176.94	10.104																															1											1
	177.2	10.1079																														1												1
	177.3	10.1093																															1											1
	177.6	10.1138																														1				1								2
	178.35	10.1249																																1										1
	178.7	10.1301																														1												1
	180.9	10.1627
	181	10.1641												2											2																				1
	181.1	10.1656									1				6										7
	181.95	10.1782															1								1
	183	10.1938
	185.75	10.2345
	185.95	10.2375													2										2
	186	10.2382
	186.6	10.2471
	188.65	10.2775
	189.7	10.293														1									1												1							1
	195	10.3716																														1												1
	199.7	10.4412									2					1									3
	199.9	10.4441
	200.2	10.4486
	216.9	10.696					1				1					5									7
	218.3	10.7167									17				3	6									26
	219.95	10.7412					1				26					15									42
	222.8	10.7834
	227.4	10.8516												10	7	1	24								42
	227.41	10.8517
	230	10.8901					1		4		18	1		27	9	17	11						5	5	88
	237.2
	251.9
	237.2
	256.28																															1		2										3
	258.8																															1												1
	264
	264.05
	267																															1												1
	272.3
	273.05																															2												2
	273.2
	276.2							1																	1
	279
	281.1
	284.9
	285
	287.15
	287.5
	288.8
	292.4
	292.5
	294.35
	295										2						1								3
	296							1																	1
	296.8
	296.9
	297.5																2								2
	299
	299.05
	299.3
	301

## Sheet: Palynomorphs_DSDP153
Caribbean Sea
Core	Section	Depth_m	Apectodinium spp.	Bitectatodinium tepikiense	Cerebrocysta sp.	Cordosphaeridium spp.	Cordosphaeridium inodes	Cordosphaeridium fibrospinosum	Dapsilidinium spp.	Dapsilidinium pastielsii	Exochosphaeridium spp.	Hafniasphaera spp.	Hystrichokolpoma spp.	Impagidinium spp.	Impagidinium patulum	Impagidiuim strialatum	Lingulodinium machaerophorum	Nematosphaeropsis labyrinthus	Operculodinium spp.	Operculodinium centrocarpum	Operculodinium ?placitum	Polysphaeridium spp.	Spiniferites spp.	Spiniferites bulloideus	Spiniferites mirabilis	Spiniferites pachydermus	Spiniferites pseudofurcatus	Spiniferites ramosus	Spiniferites ramosus multiplicatus	Spiniferites ramosus ramosus	Tectatodinium spp.	Tectatodinium pellitum	Tuberculodinium vancampoae	Brigantedinium spp.	Brigantedinium cariacoense	Brigantedinium simplex	Lejeunecysta spp.	Lejeunecysta hyalina	Lejeunecysta tenella	Paleocystodinium miocaenicum	Palaeocystodinium sp.	Selenopemphix spp.	Selenopemphix armageddonensis	Selenopemphix armata	Selenopemphix brevispinosa	Selenopemphix nephroides	Selenopemphix quanta	Selenopemphix selenoides	Trinovantedinium variabile
2	1	204	2		1									3							1							2						14	6	1	1		1				2			2		1
		206																																		1								2			1		1
3	1	207												3																							4	2						1		1
		215												5														1																1
	2	215.5												3												1											1		1
		215.9												12									1			1											1	2	3				1
	4	216												6																			1										1	1
		219					1							1	1										1																	1	3
4	1	301									1			1					38	3			1					42				1
	2	302		1						1				2		1	2		1	1			7				1	1				1
		302.5							1				1	2		2	1			2			20	2			4	3	1	1		1													1			1
	3	304											1	5		2	1	2	2	3			3				3	1				1
		304.1		2										2					2				5					3
		304.8												5					1	78	4		1					5				1						1
	4	305.7		1		1		1		1				31		1		1	1	6	1		10		1		2					2						1
		306							1	7				3						4		1	10
	5	307							1					12	1	1		1	2	27	4		2		1			2				1
		307.5		1					1					8		1			2	6	2		18		1			6				5						1						6
	6	308												1					8	4		1	3				1	1																1
		309				1								1					2	2			1
5	1	403.5									2			1					10	3																				1	1					1
		404.9							1			16		1					396	73			4		1			13
	2	405.6												1									1								1
		406
	3	406.1												1											1
		407																														2
		407.5
	4	407.95
		408.1
		408.9
6	1	413.3
		413.5
	2	414
		415
7	1	505
[truncated: 10 more columns]

## Sheet: Palynomorphs_DSDP321
Peru Basin
Samples	Core	Section	Depth_m	Cuticle	Radiolarians	Diatoms	Impagiodinium sp.	Monocolpolinites sp.	Phytoclasts	Phytoclats opaque	Fungi	Dinocysts	Impagiodinium strialatum	Nematosphaeridium sp.	Podocarpodites sp.	Trilete	Zircon	Botryococcus	Amorphous organic matter	Tectatodinium sp.
Peru 1	5	1	50-50	6	37	45	1	1	2	1
Peru 2		2	5	7	64
Peru 3			100-105	39	44		1?		9	59	11	2
Peru 4			145-150	34	82				23	35
Peru 5		3	5	43	47		2		5	45	124	2	1	1
Peru 6			100-105	44	72	3			21	55
Peru 7			145-150	57	44				23	77	105	1?
Peru 8		4	5	51	14					67
Peru 9			100-105	59	1				1	32	10
Peru 10			145-150	36	65					33
Peru 11		5	5	22	12	1			2	35	108
Peru 12			100-105		6					28
Peru 13			145-150		8				2	58	7
Peru 14		6	5		2					45
Peru 15			100-105		41				1	18	29				2
Peru 16			145-150		51					10
Peru 17	6	1	5		59				7	6	49
Peru 18			100-105		61					4
Peru 19		2	5		25		1		7	17	57					1
Peru 20			100-105		26					16
Peru 21			145-150		35		1			27	3						2
Peru 22		3	5		39					22
Peru 23			100-105		184					8	1
Peru 24			145-150		341					7
Peru 25		4	5		472	2			1	10
Peru 26			100-105		24					42									1
Peru 27		5	5		8				2	51	42	1						1
Peru 28			100-105		77					38
Peru 29			145-150		24				36	42	36						7
Peru 30		6	100-105		82					24
Peru 31	7	1	100-105		14					11							1		17
Peru 32			145-150	4	26				2	8
Peru 33		2	5							6
Peru 34			100-105							14	1
Peru 35			145-150							17
Peru 36		3	5						1	11
Peru 37			100-105						1	32	1?
Peru 38		4	5						2	12	2
Peru 39			100-105		24					20
Peru 40			145-150							32	1
Peru 41		5	5		28					13	1
Peru 42			100-105	5	34					28
Peru 43			145-150		62				4	33
Peru 44		6	5							18
Peru 45			100-105							12
Peru 46			145-150		16					12
Peru 47	8	1	5		42					8	2
Peru 48			100-105	4						4
Peru 49			145-150		82					1	2								1
Peru 50		2	5							1	3
Peru 51			100-105	1						1
Peru 52			145-150								1
Peru 53		3	100-105							1	1
Peru 54			145-150							11	3
Peru 55		4	5							21	4
Peru 56			100-105						1	16	11
Peru 57			145-150						2	6
Peru 58		5	5						3	8
Peru 59			100-105	1						7	1								3
Peru 60			145-150						2	5	3
Peru 61		6	100-105						1	3
Peru 62			145-150	6					1	1	4
Peru 63	9	1	100-105							2							1
Peru 64			145-150						1	4
Peru 65		2	100-105	7					1	1	1
Peru 66			145-150						2	1
Peru 67		3	5							1	4
Peru 68			100-105	9						1	7								7
Peru 69			145-150								1
Peru 70		4	5							4	2
Peru 71			100-105							1
Peru 72			145-150							1
Peru 73		5	5						1	10	17						1		4
Peru 74			100-105						4	16
Peru 75			145-150							2									1
Peru 76		6	100-105							5	5
Peru 77			145-150							3									7
Peru 78	10	1	100-105						1	5									6
Peru 79			145-150						1	1	1
Peru 80		2	5						2	1
Peru 81			100-105						1											4
Peru 82			145-150							3										2
Peru 83		3	100-105	1					1	4		1
Peru 84			145-150	2					1	13										3
Peru 85	11	1	5	6					1	21							1			2
Peru 86			100-105	3													1
Peru 87			145-150						1	1
Peru 88		2	5	2					1	2
Peru 89			100-105	4					1	5									1
Peru 90			145-150							4									1
Peru 91		3	5	2					1	3									1
Peru 92			100-105						1	3									2
Peru 93			145-150						1	3	2								1
Peru 94		4	5						1		4
Peru 95			100-105						1	2

## Sheet: Palynomorphs_DSDP354
Ceara Rise
Samples	Core	Section	Depth_m	Cuticle	Monocolpolinites sp.	Phytoclasts	Phytoclats opaque	Fungi	Dinocysts	Spniferites sp.	Podocarpodites sp.	Trilete	Botryococcus	Amorphous organic matter	Psilatricolporites sp.	Matonisporites sp.	Maurittidites franciscoi	Monolete	Deltoisporites sp.
Foz A. 1	4	3	0-20			2	3	8			3							1
Foz A. 2			95.97	2		4	1				1	1		2			1
Foz A. 3			114-146			3	1	1
Foz A. 4		4	0-2	4		7	2	1		1		1					1	1	2
Foz A. 5			96-98			4	1	2				5			1
Foz A. 6			141-143			8	2	1				2
Foz A. 7		5	0-2	3		7		1			2
Foz A. 8			93-95	5		9		1
Foz A. 9			138-141	1	2	5	5	3				1			4
Foz A. 10		6	0-2	1		2		4
Foz A. 11			93-95	1			6	1	1		1		2
Foz A. 12			143-145	1		6	4	1				4
Foz A. 13	5	1	23-25			11
Foz A. 14			80-82			18		1			1
Foz A. 15			135-137			16				2	1
Foz A. 16		2	0-1				7	2			1	5					4
Foz A. 17			60-61			7	6	1
Foz A. 18			104-106			6	8	2			2
Foz A. 19			145-147			3	7	2				3			2
Foz A. 20	6	1	148-150				6	2				1
Foz A. 21		2	0-2		4		3	2				1
Foz A. 22			95-97			1	4					1						4
Foz A. 23			127-129			5		1				1
Foz A. 24		3	0-2					1			3				3
Foz A. 25			99-101					1	1				1	2
Foz A. 26			146-148	11		6		1
Foz A. 27	7	1	80-82			7		1
Foz A. 28			148-150			6		1
Foz A. 29		2	0-2	1				4										1
Foz A. 30			100-102	5				4				1			1
Foz A. 31			148-150	2	2			1				1			1		4
Foz A. 32		3	0-2					1									2
Foz A. 33			102-104					5							4			2
Foz A. 34			147-149				2	1			2						3
Foz A. 35		4	0-2	6			1	2
Foz A. 36			98-100			1	1
Foz A. 37			138-140		1			4						3	3
Foz A. 38	8	1	21-23				1	2
Foz A. 39			140-142							1
Foz A. 40		2	45-47			2		1
Foz A. 41			138-140			1
Foz A. 42		3	0-2														1
Foz A. 43			103-105			1		1			1
Foz A. 44			145-147				1	1										1
Foz A. 45	9	1	55-57					1	1
Foz A. 46			143-145	5			1	1
Foz A. 47		2	0,5-2,5		3
Foz A. 48			12-104				2			1
Foz A. 49			145-147				3
Foz A. 50		3	5
Foz A. 51			100-102				1				1
Foz A. 52			145-147				1	1
Foz A. 53		4	0-2			2		1			2
Foz A. 54			98-100				1								1
Foz A. 55			133-135	3			1
Foz A. 56		5	0-3		1			1									3
Foz A. 57			99-102				2	1

[truncated: 1 more sheets: G49544]
